# Supplementary material for: LMTK1 regulates dendritic formation by regulating movement of Rab11A-positive endosomes
Source: PubMed Central journal article supplement — Mol Biol Cell. 2014 Jun 1;25(11):1755–68. doi: 10.1091/mbc.E14-01-0675 (PMC4038502; doi:10.1091/mbc.e14-01-0675), 2014-06-01

# Supplemental Materials

*Molecular Biology of the Cell*

Takano et al.

### **Supplemental Figure Legends:**

#### **Supplemental Figure S1. Knockdown of LMTK1 by micro-RNA (miRNA) in cortical neurons.**

(A) Immunoblots to show the knockdown of LMTK1 by miRNA. Cortical neurons were transfected with miRNA-LMTK1#3, miRNA-LMTK1#4 or scrambled sequence (SC) at 0 DIV. Cell lysates were prepared at 7 DIV and immunoblotted with anti-LMTK1. Actin was used as the loading control. (B) Immunostaining to show the knockdown of LMTK1 by miRNA. Cortical neurons were transfected with miRNA-SC, miRNA-LMTK1#3 or miRNA-LMTK1#4 at 0 DIV. At 7 DIV, neurons were immunostained with anti-LMTK1 (right panels). EGFP is shown in left panels. Bar, 20  $\mu\text{m}$ . (C) and (D) Cortical neurons were transfected with miRNA-SC or miRNA-LMTK1#3 at 0 DIV and at 7 DIV neurons were subjected to immunostaining with anti-PSD95 (C) or anti-GluR2 (D), which are localized in postsynaptic regions. Merges are shown in right panels. Bar, 20  $\mu\text{m}$ .

#### **Supplemental Figure S2. Downregulation of LMTK1 induced many short protrusions along dendrites of cortical neurons.**

(A) Protrusions formed by downregulation of LMTK1. Cortical neurons were transfected with miRNA-SC, miRNA-LMTK1#3 or miRNA-LMTK1#4 at 0 DIV, and were observed at 7 DIV. Bar, 5  $\mu\text{m}$ . (B) The number of protrusions was counted and expressed as the number/25  $\mu\text{m}$  along dendrites in miRNA-expressing neurons ( $n=30$  for each of neurons transfected with miRNA-SC, miRNA-LMTK1#3 and miRNA-LMTK1#4). Data represent the means  $\pm$  SD of three independent experiments ( $*P < 0.01$ , Student's *t*-test).

#### **Supplemental Figure S3. Colocalization of LMTK1 with Rab5A or Rab7 in the cell body and dendrites of cortical neurons.**

LMTK1 was cotransfected into primary cortical neurons with EGFP-Rab5A or EGFP-Rab7. LMTK1 was visualized by immunostaining with anti-LMTK1 7 days after transfection (left panels). Right side panels are dendrites, in which a portion of LMTK1 was colocalized with Rab5A (arrows). Bar, 10  $\mu\text{m}$  in the cell body and 5  $\mu\text{m}$  in dendrite.

#### **Supplemental Figure S4. Expression of LMTK1 and phospho-LMTK1 in cultured neurons.**

The lysates of mouse cortical neurons were collected from 3 to 13 DIV in culture and immunoblotted with antibodies against LMTK1, phospho-Ser34 of LMTK1 (pS34), p35, Cdk5, Rab11A, GluR2 and PSD95. Actin was used as the loading control.

### **Supplemental Videos:**

#### **Video 1. Transport of Rab11A-positive endosomes in the cell body of LMTK1<sup>+/+</sup> neurons.**

EGFP-Rab11A was transfected into cortical neurons at 6 DIV. Movements of Rab11A-positive endosomes were recorded by real time imaging at 7 DIV in the cell body. Frames were taken every 1 s with a Zeiss Confocal microscope LSM 710 (Carl Zeiss).

#### **Video 2. Transport of Rab11A-positive endosomes in the cell body of LMTK1<sup>-/-</sup> neurons.**

EGFP-Rab11A was transfected into LMTK1<sup>-/-</sup> neurons at 6 DIV. Movements of Rab11A-positive endosomes were recorded by real time imaging at 7 DIV in the cell body. Frames were taken every 1 s with a Zeiss Confocal microscope LSM 710 (Carl Zeiss).

#### **Video 3. Transport of Rab11A-positive endosomes in dendrites of LMTK1<sup>+/+</sup> neurons.**

EGFP-Rab11A was transfected into cortical neurons at 6 DIV. Movements of Rab11A-positive endosomes were recorded by real time imaging at 7 DIV in secondary dendrites. Frames were taken every 1 s with a Zeiss Confocal microscope LSM 710 (Carl Zeiss).

#### **Video 4. Transport of Rab11A-positive endosomes in dendrites of LMTK1<sup>-/-</sup> neurons.**

EGFP-Rab11A was transfected into LMTK1<sup>-/-</sup> neurons at 6 DIV. Movements of Rab11A-positive endosomes were recorded by real time imaging at 7 DIV in secondary dendrites. Frames were taken every 1 s with a Zeiss Confocal microscope LSM 710 (Carl Zeiss).

#### **Video 5. Movement of a Rab11A-positive endosome in axon of LMTK1<sup>+/+</sup> neurons at 7 DIV.**

EGFP-Rab11A was transfected into cortical neurons at 6 DIV. Movements of Rab11A-positive endosomes in axon were recorded by real time imaging at 7 DIV. Frames were taken every 1 s with a

Zeiss Confocal microscope LSM 710 (Carl Zeiss).

**Video 6. Movement of a Rab11A-positive endosome in axon of LMTK1<sup>-/-</sup> neurons at 7 DIV.**

EGFP-Rab11A was transfected into LMTK1<sup>-/-</sup> neurons at 6 DIV. Movements of Rab11A-positive endosomes in axon was recorded by real time imaging at 7 DIV. Frames were taken every 1 s with a Zeiss confocal microscope LSM 710 (Carl Zeiss).

**Video 7. Movement of a constitutive active Rab11A-Q70L-positive endosomes in LMTK1<sup>+/+</sup> neurons.**

EGFP-Rab11A-Q70L was transfected into cortical neurons at 6 DIV. Movements of Rab11A-Q70L-positive endosomes in dendrites were recorded by real time imaging at 7 DIV. Frames were taken every 1 s with a Zeiss Confocal microscope LSM 710 (Carl Zeiss).

**Video 8. Movement of a dominant negative Rab11A-S25N-positive endosome in LMTK1<sup>+/+</sup> neurons.**

EGFP-Rab11A-S25N was transfected into cortical neurons at 6 DIV. Movements of Rab11A-S25N-positive endosomes were recorded by real time imaging at 7 DIV in dendrites. Frames were taken every 1 s with a Zeiss Confocal microscope LSM 710 (Carl Zeiss).

**Video 9. Movement of Rab11A-positive endosomes in growth cone of LMTK1<sup>+/+</sup> neurons.**

EGFP-Rab11A was cotransfected with DsRed into cortical neurons at 6 DIV. Movements of Rab11A-positive endosomes in growth cone were recorded by real time imaging at 7 DIV. Frames were taken every 1.6 s with a Zeiss Confocal microscope LSM 710 (Carl Zeiss).

**Video 10. Movement of Rab11A-positive endosomes in growth cone of LMTK1<sup>-/-</sup> neurons.**

EGFP-Rab11A was cotransfected with DsRed into LMTK1<sup>-/-</sup> neurons at 6 DIV. Movements of Rab11A-positive endosomes in growth cone were recorded by real time imaging at 7 DIV. Frames were taken every 1.6 s with a Zeiss Confocal microscope LSM 710 (Carl Zeiss).

Figure S1. Takano et al

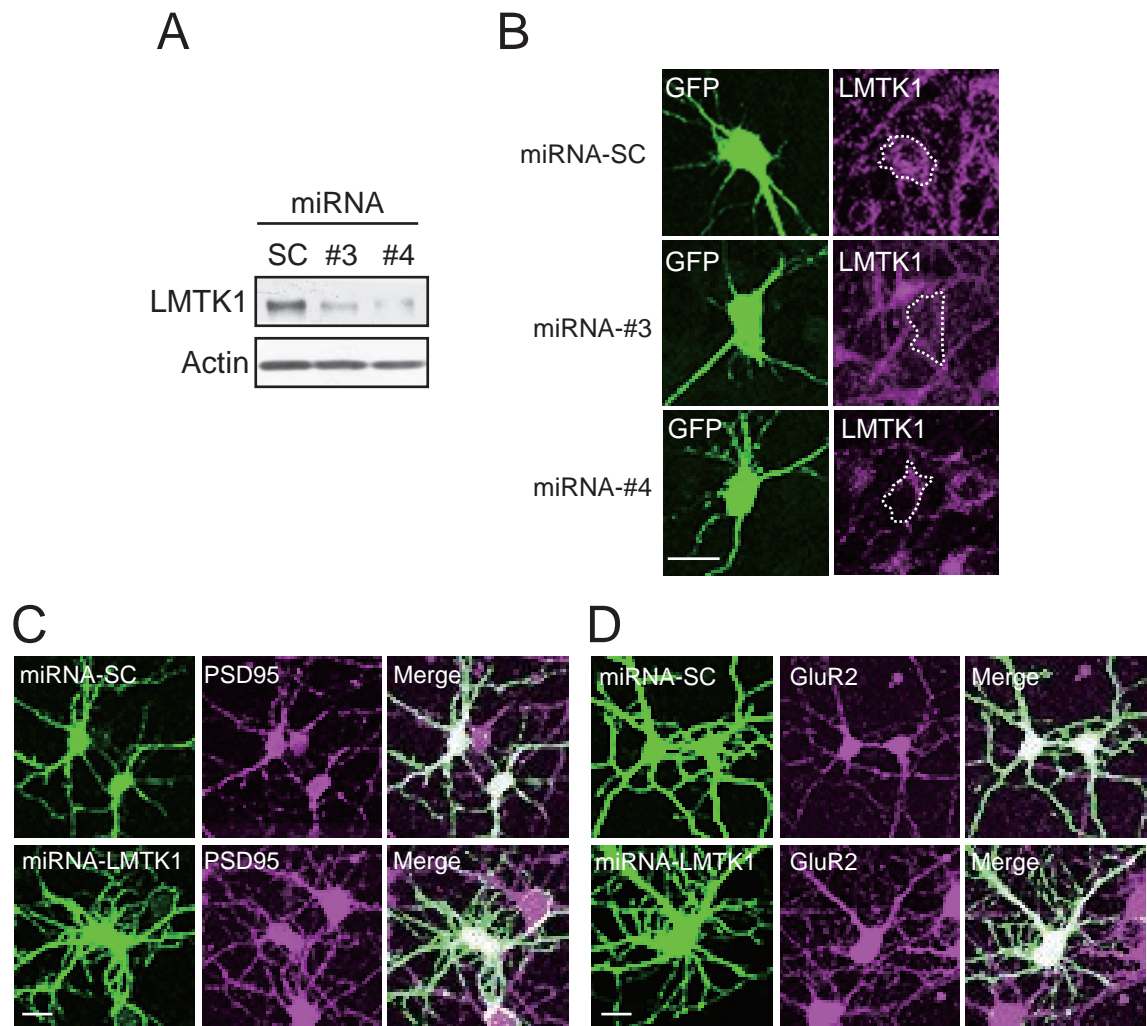

Figure S2. Takano et al

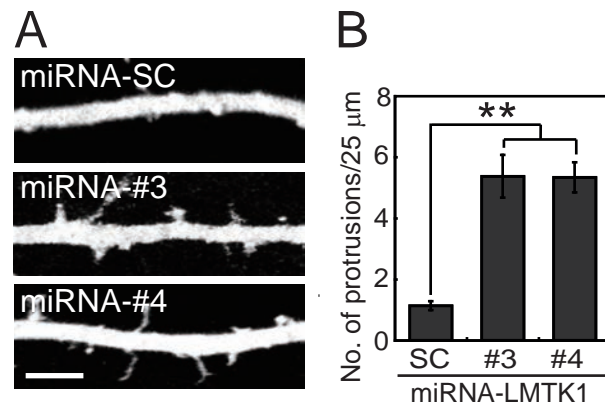

Figure S3. Takano et al

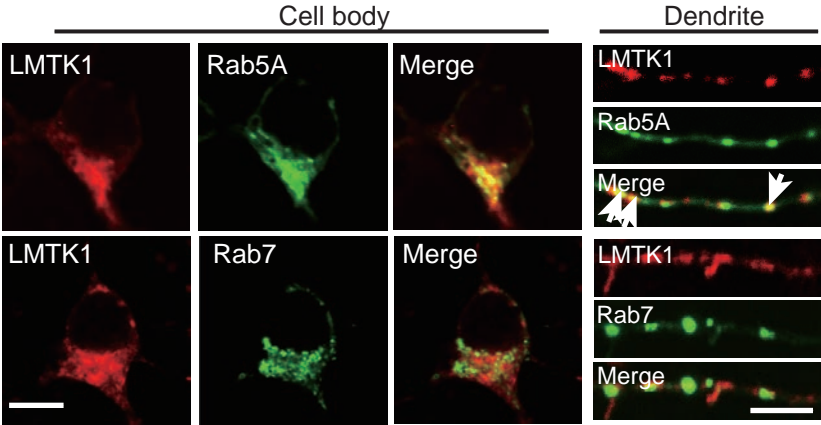

Figure S4. Takano et al

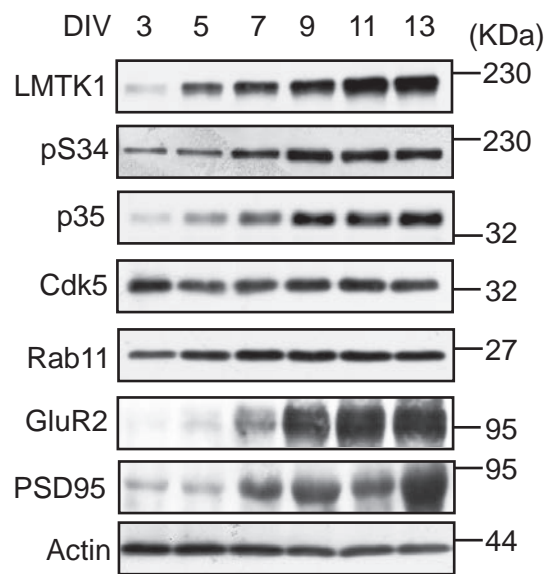

Supplement: supp_E14-01-0675v1_CombinedSupMats.pdf [file supp_E14-01-0675v1_CombinedSupMats.pdf]
